# Supplementary material
Source: MDPI journal article supplement (https://www.mdpi.com/2073-4352/13/10/1488)
Supplement: s1 [file s1]

## Supplementary materials

### Crystal structure and spectroscopic analysis of 3-diethoxyphosphoryl-28-[1-(1-deoxy- $\beta$ -D-glucopyranosyl)-1H-1,2,3-triazol-4-yl]carbonylbetulin

Monika Kadela-Tomanek, Ewa Bębenek, Arkadiusz Sokal, Maria Książek, Elwira Chrobak

#### Table of contents

|                                                                                                                                                                             |   |
|-----------------------------------------------------------------------------------------------------------------------------------------------------------------------------|---|
| Figure S1. Atom by atom superimposition of the compounds <b>2</b> (blue molecule) and <b>3</b> (violet molecule). .....                                                     | 2 |
| Figure S2. Hirshfeld surface mapped with a. $d_{\text{norm}}$ , b. $di$ , c. $de$ , d. shape index, e. curvedness index and f. fragment patch for compound <b>3</b> . ..... | 2 |
| Table S1. Experimental data and refinement details of compound <b>3</b> . .....                                                                                             | 3 |
| Table S2. Experimental bond length in crystal structure of compound <b>3</b> . .....                                                                                        | 3 |
| Table S3. Experimental bond angle in crystal structure of compound <b>3</b> . .....                                                                                         | 5 |
| Table S4. Experimental torsion angle in crystal structure of compound <b>3</b> . .....                                                                                      | 6 |

Figure S1. Atom by atom superimposition of the compounds **2** (blue molecule) and **3** (violet molecule).

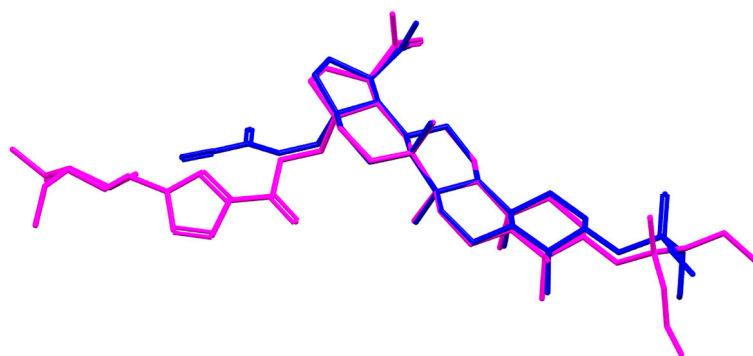

Figure S2. Hirshfeld surface mapped with a.  $d_{\text{norm}}$ , b.  $d_i$ , c.  $d_e$ , d. shape index, e. curvedness index and f. fragment patch for compound **3**.

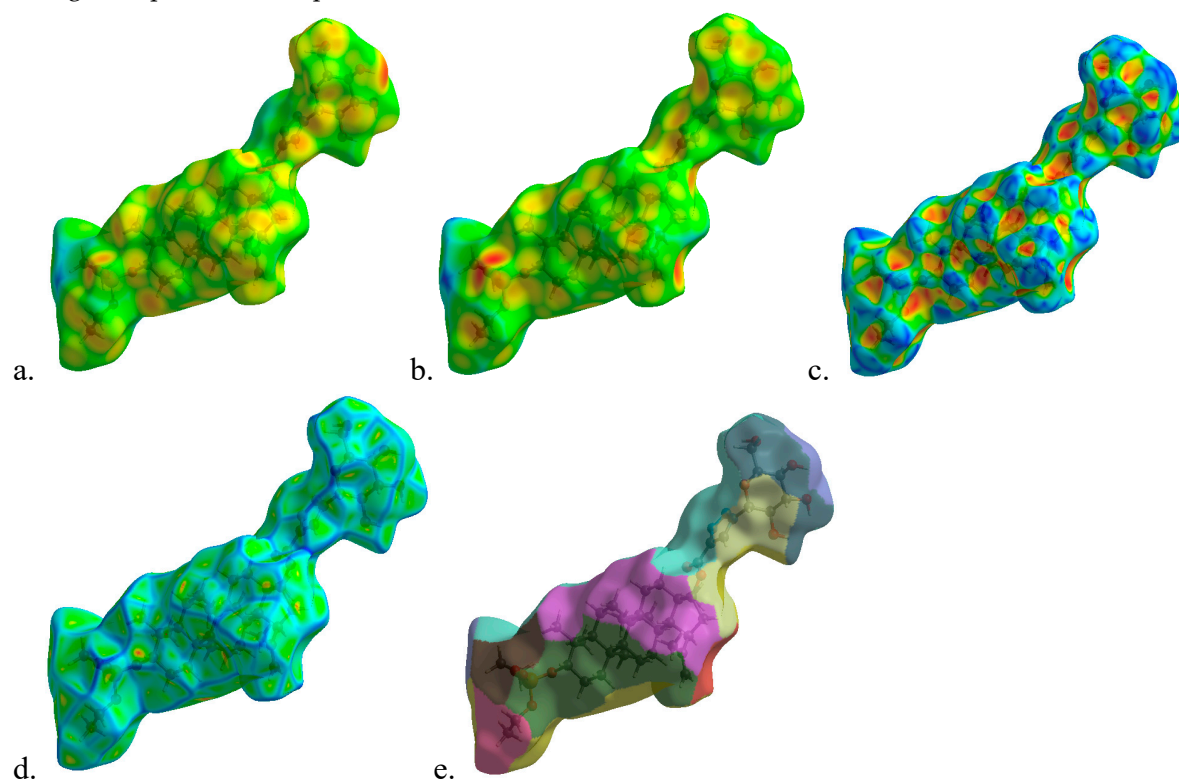

Table S1. Experimental data and refinement details of compound **3**.

|                                                     |                                                                  |
|-----------------------------------------------------|------------------------------------------------------------------|
| <b>Compound</b>                                     | <b>3</b>                                                         |
| <b>Empirical formula</b>                            | C <sub>43</sub> H <sub>70</sub> N <sub>3</sub> O <sub>11</sub> P |
| <b>Formula weight</b>                               | 835.99                                                           |
| <b>Temperature</b>                                  | 100(1) K                                                         |
| <b>Crystal system</b>                               | monoclinic                                                       |
| <b>Space group</b>                                  | P 21                                                             |
| <b>Unit cell dimensions</b>                         |                                                                  |
| a [Å]                                               | 13.8397(12)                                                      |
| b [Å]                                               | 8.3259(3)                                                        |
| c [Å]                                               | 18.869(2)                                                        |
| α [°]                                               | 90                                                               |
| β [°]                                               | 95.161(10)                                                       |
| γ [°]                                               | 90                                                               |
| <b>Volume</b>                                       | 2165.4(3)                                                        |
| <b>Z</b>                                            | 2                                                                |
| <b>Density (calculated) [Mg/m<sup>3</sup>]</b>      | 1.282                                                            |
| <b>Absorption coefficient [mm<sup>-1</sup>]</b>     | 1.076                                                            |
| <b>F(000)</b>                                       | 904                                                              |
| <b>Crystal size [mm<sup>3</sup>]</b>                | 0.330 x 0.030 x 0.020                                            |
| <b>Theta range for data collection [°]</b>          | 3.206 to 73.880                                                  |
| <b>Index ranges</b>                                 | -17 ≤ h ≤ 17<br>-7 ≤ k ≤ 10<br>-23 ≤ l ≤ 23                      |
| <b>Reflections collected</b>                        | 17512                                                            |
| <b>Independent reflections</b>                      | 6208 [R(int) = 0.0817]                                           |
| <b>Completeness to theta = 67.684°</b>              | 99.5 %                                                           |
| <b>Absorption correction</b>                        | Semi-empirical from equivalents                                  |
| <b>Max. and min. transmission</b>                   | 0.718 and 0.979                                                  |
| <b>Refinement method</b>                            | Full-matrix least-squares on F <sup>2</sup>                      |
| <b>Data / restraints / parameters</b>               | 6208/1/537                                                       |
| <b>Goodness-of-fit on F2</b>                        | 1.036                                                            |
| <b>Final R indices [I&gt;2σ(I)]</b>                 | R1 = 0.0919, wR2 = 0.0919                                        |
| <b>R indices (all data)</b>                         | R1 = 0.1356, wR2 = 0.2470                                        |
| <b>Largest diff. peak and hole[eÅ<sup>-3</sup>]</b> | 0.797 and -0.553                                                 |

Table S2. Experimental bond length in crystal structure of compound **3**.

| Bond   | Length [Å] | Bond   | Length [Å] | Bond     | Length [Å] |
|--------|------------|--------|------------|----------|------------|
| P1-O1  | 1.5337     | C5-C6  | 1.5370     | C24-H24C | 0.9800     |
| P1-O4  | 1.4774     | C5-C10 | 1.5697     | C25-H25A | 0.9800     |
| P1-O5  | 1.5517     | C6-H6A | 0.9900     | C25-H25B | 0.9800     |
| P1-O6  | 1.5782     | C6-H6B | 0.9900     | C25-H25C | 0.9800     |
| O1-C3  | 1.4908     | C6-C7  | 1.5322     | C26-H26A | 0.9800     |
| O2-C28 | 1.4742     | C7-H7A | 0.9900     | C26-H26B | 0.9800     |
| O2-C31 | 1.3532     | C7-H7B | 0.9900     | C26-H26C | 0.9800     |
| O3-C31 | 1.1871     | C7-C8  | 1.5401     | C27-H27A | 0.9800     |
| O5-C34 | 1.4342     | C8-C9  | 1.5641     | C27-H27B | 0.9800     |
| O6-C36 | 1.4393     | C8-C14 | 1.5920     | C27-H27C | 0.9800     |

|          |        |          |        |          |        |
|----------|--------|----------|--------|----------|--------|
| O7-C38   | 1.4009 | C8-C26   | 1.5599 | C28-H28A | 0.9900 |
| O7-C42   | 1.4340 | C9-H9A   | 1.0000 | C28-H28B | 0.9900 |
| O8-H8    | 0.8400 | C9-C10   | 1.5674 | C29-H29A | 0.9800 |
| O8-C39   | 1.4257 | C9-C11   | 1.5460 | C29-H29B | 0.9800 |
| O9-H9    | 0.8400 | C10-C25  | 1.5423 | C29-H29C | 0.9800 |
| O9-C40   | 1.4029 | C11-H11A | 0.9900 | C30-H30A | 0.9500 |
| O10-H10  | 0.8400 | C11-H11B | 0.9900 | C30-H30B | 0.9500 |
| O10-C41  | 1.4382 | C11-C12  | 1.5396 | C31-C32  | 1.4815 |
| O11-H11  | 0.8400 | C12-H12A | 0.9900 | C32-C33  | 1.3595 |
| O11-C43  | 1.4098 | C12-H12B | 0.9900 | C33-H33  | 0.9500 |
| N1-N2    | 1.3339 | C12-C13  | 1.5269 | C34-H34A | 0.9900 |
| N1-C32   | 1.3618 | C13-H13  | 1.0000 | C34-H34B | 0.9900 |
| N2-N3    | 1.3586 | C13-C14  | 1.5887 | C34-C35  | 1.5193 |
| N3-C33   | 1.3499 | C13-C18  | 1.5234 | C35-H35A | 0.9800 |
| N3-C38   | 1.4476 | C14-C15  | 1.5507 | C35-H35B | 0.9800 |
| C1-H1A   | 0.9900 | C14-C27  | 1.5474 | C35-H35C | 0.9800 |
| C1-H1B   | 0.9900 | C15-H15A | 0.9900 | C36-H36A | 0.9900 |
| C1-C2    | 1.5511 | C15-H15B | 0.9900 | C36-H36B | 0.9900 |
| C1-C10   | 1.5360 | C15-C16  | 1.5351 | C36-C37  | 1.4522 |
| C2-H2A   | 0.9900 | C16-H16A | 0.9900 | C37-H37A | 0.9800 |
| C2-H2B   | 0.9900 | C16-H16B | 0.9900 | C37-H37B | 0.9800 |
| C2-C3    | 1.4980 | C16-C17  | 1.5397 | C37-H37C | 0.9800 |
| C3-H3    | 1.0000 | C17-C18  | 1.5680 | C38-H38  | 1.0000 |
| C3-C4    | 1.5505 | C17-C22  | 1.5259 | C38-C39  | 1.5226 |
| C4-C5    | 1.5389 | C17-C28  | 1.5174 | C39-H39  | 1.0000 |
| C4-C23   | 1.5365 | C18-H18  | 1.0000 | C39-C40  | 1.5219 |
| C4-C24   | 1.5413 | C18-C19  | 1.5553 | C40-H40  | 1.0000 |
| C21-H21B | 0.9900 | C19-H19  | 1.0000 | C40-C41  | 1.5205 |
| C21-C22  | 1.5454 | C19-C20  | 1.5118 | C41-H41  | 1.0000 |
| C22-H22A | 0.9900 | C19-C21  | 1.5681 | C41-C42  | 1.5003 |
| C22-H22B | 0.9900 | C20-C29  | 1.4772 | C42-H42  | 1.0000 |
| C23-H23A | 0.9800 | C20-C30  | 1.3544 | C42-C43  | 1.5222 |
| C23-H23B | 0.9800 | C21-H21A | 0.9900 | C43-H43A | 0.9900 |
| C23-H23C | 0.9800 | C24-H24A | 0.9800 | C43-H43B | 0.9900 |
| C5-H5    | 1.0000 | C24-H24B | 0.9800 |          |        |

Table S3. Experimental bond angle in crystal structure of compound **3**.

| Bond Angle    | [°]    |
|---------------|--------|---------------|--------|---------------|--------|---------------|--------|
| O1-P1-O4      | 115.25 | C5-C6-C7      | 111.11 | C14-C15-H15A  | 108.43 | C4-C24-H24B   | 109.47 |
| O1-P1-O5      | 107.05 | H6A-C6-H6B    | 108.02 | C14-C15-H15B  | 108.43 | C4-C24-H24C   | 109.47 |
| O1-P1-O6      | 101.66 | H6A-C6-C7     | 109.41 | C14-C15-C16   | 115.40 | H24A-C24-H24B | 109.47 |
| O4-P1-O5      | 109.78 | H6B-C6-C7     | 109.41 | H15A-C15-H15B | 107.47 | H24A-C24-H24C | 109.47 |
| O4-P1-O6      | 113.64 | C6-C7-H7A     | 108.82 | H15A-C15-C16  | 108.42 | H24B-C24-H24C | 109.47 |
| O5-P1-O6      | 108.96 | C6-C7-H7B     | 108.82 | H15B-C15-C16  | 108.43 | C10-C25-H25A  | 109.47 |
| P1-O1-C3      | 125.43 | C6-C7-C8      | 113.72 | C15-C16-H16A  | 109.34 | C10-C25-H25B  | 109.47 |
| C28-O2-C31    | 118.23 | H7A-C7-H7B    | 107.68 | C15-C16-H16B  | 109.34 | C10-C25-H25C  | 109.47 |
| P1-O5-C34     | 121.34 | H7A-C7-C8     | 108.82 | C15-C16-C17   | 111.42 | H25A-C25-H25B | 109.47 |
| P1-O6-C36     | 120.49 | H7B-C7-C8     | 108.82 | H16A-C16-H16B | 107.98 | H25A-C25-H25C | 109.47 |
| C38-O7-C42    | 111.87 | C7-C8-C9      | 109.54 | H16A-C16-C17  | 109.34 | H25B-C25-H25C | 109.47 |
| H8-O8-C39     | 109.47 | C7-C8-C14     | 109.50 | H16B-C16-C17  | 109.34 | C8-C26-H26A   | 109.47 |
| H9-O9-C40     | 109.47 | C7-C8-C26     | 107.47 | C16-C17-C18   | 105.66 | C8-C26-H26B   | 109.47 |
| H10-O10-C41   | 109.47 | C9-C8-C14     | 108.22 | C16-C17-C22   | 117.23 | C8-C26-H26C   | 109.47 |
| H11-O11-C43   | 109.47 | C9-C8-C26     | 112.23 | C16-C17-C28   | 110.57 | H26A-C26-H26B | 109.47 |
| N2-N1-C32     | 107.92 | C14-C8-C26    | 109.86 | C18-C17-C22   | 101.59 | H26A-C26-H26C | 109.47 |
| N1-N2-N3      | 106.61 | C8-C9-H9A     | 105.69 | C18C17-C28    | 110.99 | H26B-C26-H26C | 109.47 |
| N2-N3-C33     | 111.16 | C8-C9-C10     | 115.79 | C22-C17-C28   | 110.28 | C14-C27-H27A  | 109.47 |
| N2-N3-C38     | 121.99 | C8-C9-C11     | 110.15 | C13-C18-C17   | 111.35 | C14-C27-H27B  | 109.47 |
| C33-N3-C38    | 126.56 | H9A-C9-C10    | 105.69 | C13-C18-H18   | 107.18 | C14-C27-H27C  | 109.47 |
| H1A-C1-H1B    | 107.89 | H9A-C9-C11    | 105.69 | C13-C18-C19   | 118.95 | H27A-C27-H27B | 109.47 |
| H1A-C1-C2     | 109.18 | C10-C9-C11    | 112.96 | C17-C18-H18   | 107.18 | H27A-C27-H27C | 109.47 |
| H1A-C1-C10    | 109.18 | C1-C10-C5     | 108.09 | C17-C18-C19   | 104.43 | H27B-C27-H27C | 109.47 |
| H1B-C1-C2     | 109.18 | C1-C10-C9     | 108.58 | H18-C18-C19   | 107.18 | O2-C28-C17    | 108.48 |
| H1B-C1-C10    | 109.18 | C1-C10-C25    | 107.39 | C18-C19-H19   | 109.20 | O2-C28-H28A   | 110.00 |
| C2-C1-C10     | 112.13 | C5-C10-C9     | 106.34 | C18-C19-C20   | 113.14 | O2-C28-H28B   | 110.00 |
| C1-C2-H2A     | 109.71 | C5-C10-C25    | 112.65 | C18-C19-C21   | 104.74 | C17-C28-H28A  | 110.00 |
| C1-C2-H2B     | 109.71 | C9-C10-C25    | 113.61 | H19-C19-C20   | 109.20 | C17-C28-H28B  | 110.00 |
| C1-C2-C3      | 109.81 | C9-C11-H11A   | 108.64 | H19-C19-C21   | 109.20 | H28A-C28-H28B | 108.37 |
| H2A-C2-H2B    | 108.19 | C9-C11-H11B   | 108.64 | C20-C19-C21   | 111.23 | C20-C29-H29A  | 109.47 |
| H2A-C2-C3     | 109.70 | C9-C11-C12    | 114.49 | C19-C20-C29   | 117.66 | C20-C29-H29B  | 109.47 |
| H2B-C2-C3     | 109.70 | H11A-C11-H11B | 107.59 | C19-C20-C30   | 121.84 | C20-C29-H29C  | 109.47 |
| O1-C3-C2      | 107.93 | H11A-C11-C12  | 108.64 | C29-C20-C30   | 120.50 | H29A-C29-H29B | 109.47 |
| O1-C3-H3      | 108.70 | H11B-C11-C12  | 108.64 | C19-C21-H21A  | 110.50 | H29A-C29-H29C | 109.47 |
| O1-C3-C4      | 108.74 | C11-C12-H12A  | 109.28 | C19-C21-H21B  | 110.50 | H29B-C29-H29C | 109.47 |
| C2-C3-H3      | 108.70 | C11-C12-H12B  | 109.28 | C19-C21-C22   | 106.15 | C20-C30-H30A  | 120.00 |
| C2-C3-C4      | 113.97 | C11-C12-C13   | 111.68 | H21A-C21-H21B | 108.68 | C20-C30-H30B  | 120.00 |
| H3-C3-C4      | 108.70 | H12A-C12-H12B | 107.95 | H21A-C21-C22  | 110.50 | H30A-C30-H30B | 120.00 |
| C3-C4-C5      | 105.89 | H12A-C12-C13  | 109.28 | H21B-C21-C22  | 110.50 | O2-C31-O3     | 125.49 |
| C3-C4-C23     | 107.30 | H12B-C12-C13  | 109.28 | C17-C22-C21   | 103.52 | O2-C31-C32    | 109.06 |
| C3-C4-C24     | 111.17 | C12-C13-H13   | 107.65 | C17-C22-H22A  | 111.06 | O3-C31-C32    | 125.43 |
| C5-C4-C23     | 109.92 | C12-C13-C14   | 110.92 | C17-C22-H22B  | 111.06 | N1-C32-C31    | 121.87 |
| C5-C4-C24     | 114.85 | C12-C13-C18   | 114.05 | C21-C22-H22A  | 111.06 | N1-C32-C33    | 109.87 |
| C23-C4-C24    | 107.48 | H13-C13-C14   | 107.65 | C21-C22-H22B  | 111.06 | C31-C32-C33   | 128.06 |
| C4-C5-H5      | 104.18 | H13-C13-C18   | 107.65 | H22A-C22-H22B | 109.03 | N3-C33-C32    | 104.43 |
| C4-C5-C6      | 113.55 | C14-C13-C18   | 108.68 | C4-C23-H23A   | 109.47 | N3-C33-H33    | 127.79 |
| C4-C5-C10     | 118.25 | C8-C14-C13    | 105.97 | C4-C23-H23B   | 109.47 | C32-C33-H33   | 127.79 |
| H5-C5-C6      | 104.18 | C8-C14-C15    | 110.85 | C4-C23-H23C   | 109.47 | O5-C34-H34A   | 109.84 |
| H5-C5-C10     | 104.18 | C8-C14-C27    | 111.77 | H23A-C23-H23B | 109.47 | O5-C34-H34B   | 109.84 |
| C6-C5-C10     | 110.76 | C13-C14-C15   | 111.11 | H23A-C23-H23C | 109.47 | O5-C34-C35    | 109.21 |
| C5-C6-H6A     | 109.41 | C13-C14-C27   | 110.21 | H23B-C23-H23C | 109.47 | H34A-C34-H34B | 108.27 |
| C5-C6-H6B     | 109.41 | C15-C14-C27   | 106.99 | C4-C24-H24A   | 109.47 | H34A-C34-C35  | 109.84 |
| H34B-C34-C35  | 109.84 | N3-C33-C32    | 104.43 | O5-C34-C35    | 109.21 | C34-C35-H35B  | 109.47 |
| C34-C35-H35A  | 109.47 | N3-C33-H33    | 127.79 | H34A-C34-H34B | 108.27 | C34-C35-H35C  | 109.47 |
| C34-C35-H35B  | 109.47 | C32-C33-H33   | 127.79 | H34A-C34-C35  | 109.84 | H35A-C35-H35B | 109.47 |
| C34-C35-H35C  | 109.47 | O5-C34-H34A   | 109.84 | H34B-C34-C35  | 109.84 | H35A-C35-H35C | 109.47 |
| H35A-C35-H35B | 109.47 | O5-C34-H34B   | 109.84 | C34-C35-H35A  | 109.47 | H35B-C35-H35C | 109.47 |
| O6-C36-H36B   | 109.38 | H37B-C37-H37C | 109.47 | C38-C39-H39   | 109.94 | O10-C41-H41   | 108.89 |
| O6-C36-C37    | 111.27 | O7-C38-N3     | 108.31 | C38-C39-C40   | 108.07 | O10-C41-C42   | 105.87 |

|               |        |              |        |              |        |               |        |
|---------------|--------|--------------|--------|--------------|--------|---------------|--------|
| H36A-C36-H36B | 108.00 | O7-C38-H38   | 108.62 | H39-C39-C40  | 109.95 | C40-C41-H41   | 108.89 |
| H36A-C36-C37  | 109.38 | O7-C38-C39   | 110.29 | O9-C40-C39   | 115.17 | C40-C41-C42   | 113.80 |
| H36B-C36-C37  | 109.38 | N3-C38-H38   | 108.62 | O9-C40-H40   | 107.74 | H41-C41-C42   | 108.89 |
| C36-C37-H37A  | 109.47 | N3-C38-C39   | 112.29 | O9-C40-C41   | 106.71 | O7-C42-C41    | 110.95 |
| C36-C37-H37B  | 109.47 | H38-C38-C39  | 108.63 | C39-C40-H40  | 107.74 | O7-C42-H42    | 109.17 |
| C36-C37-H37C  | 109.47 | O8-C39-C38   | 107.07 | C39-C40-C41  | 111.47 | O7-C42-C43    | 107.06 |
| H37A-C37-H37B | 109.47 | O8-C39-H39   | 109.95 | H40-C40-C41  | 107.74 | C41-C42-H42   | 109.17 |
| H37A-C37-H37C | 109.47 | O8-C39-C40   | 111.79 | O10-C41-C40  | 110.38 | C41-C42-C43   | 111.27 |
| H42-C42-C43   | 109.17 | O11-C43-H43A | 109.55 | C42-C43-H43A | 109.55 | H43A-C43-H43B | 108.10 |
| O11-C43-C42   | 110.48 | O11-C43-H43B | 109.55 | C42-C43-H43B | 109.55 |               |        |

Table S4. Experimental torsion angle in crystal structure of compound 3.

| Torsion Angle    | [°]     | Torsion Angle   | [°]     | Torsion Angle    | [°]     |
|------------------|---------|-----------------|---------|------------------|---------|
| O4-P1-O1-C3      | 15.84   | H6B-C6-C7-H7A   | 55.28   | C28-C17-C18-C13  | -52.83  |
| O5-P1-O1-C3      | 138.25  | H6B-C6-C7-H7B   | -61.80  | C28-C17-C18-H18  | -169.74 |
| O6-P1-O1-C3      | -107.53 | H6B-C6-C7-C8    | 176.74  | C28-C17-C18-C19  | 76.76   |
| O1-P1-O5-C34     | 50.35   | C6-C7-C8-C9     | -49.20  | C16-C17-C22-C21  | 158.06  |
| O4-P1-O5-C34     | 176.12  | C6-C7-C8-C14    | -167.73 | C16-C17-C22-H22A | 38.81   |
| O6-P1-O5-C34     | -58.85  | C6-C7-C8-C26    | 72.98   | C16-C17-C22-H22B | -82.69  |
| O1-P1-O6-C36     | 171.21  | H7A-C7-C8-C9    | 72.26   | C18-C17-C22-C21  | 43.51   |
| O4-P1-O6-C36     | 46.75   | H7A-C7-C8-C14   | -46.27  | C18-C17-C22-H22A | -75.74  |
| O5-P1-O6-C36     | -76.00  | H7A-C7-C8-C26   | -165.56 | C18-C17-C22-H22B | 162.75  |
| P1-O1-C3-C2      | 111.32  | H7B-C7-C8-C9    | -170.66 | C28-C17-C22-C21  | -74.24  |
| P1-O1-C3-H3      | -6.40   | H7B-C7-C8-C14   | 70.81   | C28-C17-C22-H22A | 166.51  |
| P1-O1-C3-C4      | -124.58 | H7B-C7-C8-C26   | -48.48  | C28-C17-C22-H22B | 45.00   |
| C31-O2-C28-C17   | -124.73 | C7-C8-C9-H9A    | -65.46  | C16-C17-C28-O2   | 68.73   |
| C31-O2-C28-H28A  | 114.91  | C7-C8-C9-C10    | 51.12   | C16-C17-C28-H28A | -170.91 |
| C31-O2-C28-H28B  | -4.38   | C7-C8-C9-C11    | -179.18 | C16-C17-C28-H28B | -51.62  |
| C28-O2-C31-O3    | 5.95    | C14-C8-C9-H9A   | 53.86   | C18-C17-C28-O2   | -174.33 |
| C28-O2-C31-C32   | -172.92 | C14-C8-C9-C10   | 170.45  | C18-C17-C28-H28A | -53.98  |
| P1-O5-C34-H34A   | 53.45   | C14-C8-C9-C11   | -59.85  | C18-C17-C28-H28B | 65.31   |
| P1-O5-C34-H34B   | -65.53  | C26-C8-C9-H9A   | 175.25  | C22-C17-C28-O2   | -62.55  |
| P1-O5-C34-C35    | 173.96  | C26-C8-C9-C10   | -68.16  | C22-C17-C28-H28A | 57.81   |
| P1-O6-C36-H36A   | 2.25    | C26-C8-C9-C11   | 61.54   | C22-C17-C28-H28B | 177.10  |
| P1-O6-C36-H36B   | -115.84 | C7-C8-C14-C13   | -175.94 | C13-C18-C19-H19  | 29.51   |
| P1-O6-C36-C37    | 123.20  | C7-C8-C14-C15   | -55.28  | C13-C18-C19-C20  | -92.33  |
| C42-O7-C38-N3    | 170.09  | C7-C8-C14-C27   | 63.99   | C13-C18-C19-C21  | 146.37  |
| C42-O7-C38-H38   | 52.28   | C9-C8-C14-C13   | 64.71   | C17-C18-C19-H19  | -95.37  |
| C42-O7-C38-C39   | -66.66  | C9-C8-C14-C15   | -174.63 | C17-C18-C19-C20  | 142.79  |
| C38-O7-C42-C41   | 58.83   | C9-C8-C14-C27   | -55.36  | C17-C18-C19-C21  | 21.48   |
| C38-O7-C42-H42   | -61.52  | C26-C8-C14-C13  | -58.13  | H18-C18-C19-H19  | 151.13  |
| C38-O7-C42-C43   | -179.58 | C26-C8-C14-C15  | 62.52   | H18-C18-C19-C20  | 29.29   |
| H8-O8-C39-C38    | -169.88 | C26-C8-C14-C27  | -178.21 | H18-C18-C19-C21  | -92.02  |
| H8-O8-C39-H39    | 70.71   | C7-C8-C26-H26A  | -44.43  | C18-C19-C20-C29  | -61.80  |
| H8-O8-C39-C40    | -51.70  | C7-C8-C26-H26B  | -164.43 | C18-C19-C20-C30  | 117.74  |
| H9-O9-C40-C39    | -42.51  | C7-C8-C26-H26C  | 75.57   | H19-C19-C20-C29  | 176.36  |
| H9-O9-C40-H40    | 77.74   | C9-C8-C26-H26A  | 76.06   | H19-C19-C20-C30  | -4.10   |
| H9-O9-C40-C41    | -166.80 | C9-C8-C26-H26B  | -43.94  | C21-C19-C20-C29  | 55.77   |
| H10-O10-C41-C40  | 49.86   | C9-C8-C26-H26C  | -163.94 | C21-C19-C20-C30  | -124.69 |
| H10-O10-C41-H41  | -69.62  | C14-C8-C26-H26A | -163.50 | C18-C19-C21-H21A | 125.03  |
| H10-O10-C41-C42  | 173.45  | C14-C8-C26-H26B | 76.50   | C18-C19-C21-H21B | -114.65 |
| H11-O11-C43-C42  | 102.53  | C14-C8-C26-H26C | -43.50  | C18-C19-C21-C22  | 5.19    |
| H11-O11-C43-H43A | -18.25  | C8-C9-C10-C1    | -171.74 | H19-C19-C21-H21A | -118.12 |
| H11-O11-C43-H43B | -136.68 | C8-C9-C10-C5    | -55.64  | H19-C19-C21-H21B | 2.21    |
| C32-N1-N2-N3     | -1.08   | C8-C9-C10-C25   | 68.85   | H19-C19-C21-C22  | 122.05  |
| N2-N1-C32-C31    | -174.80 | H9A-C9-C10-C1   | -55.16  | C20-C19-C21-H21A | 2.47    |
| N2-N1-C32-C33    | 0.45    | H9A-C9-C10-C5   | 60.95   | C20-C19-C21-H21B | 122.80  |
| N1-N2-N3-C33     | 1.37    | H9A-C9-C10-C25  | -174.56 | C20-C19-C21-C22  | -117.36 |
| N1-N2-N3-C38     | 175.62  | C11-C9-C10-C1   | 59.93   | C19-C20-C29-H29A | 70.16   |
| N2-N3-C33-C32    | -1.07   | C11-C9-C10-C5   | 176.04  | C19-C20-C29-H29B | -49.84  |

|                 |         |                   |         |                   |         |
|-----------------|---------|-------------------|---------|-------------------|---------|
| N2-N3-C33-H33   | 178.92  | C11-C9-C10-C25    | -59.48  | C19-C20-C29-H29C  | -169.84 |
| C38-N3-C33-C32  | -175.00 | C8-C9-C11-H11A    | 173.78  | C30-C20-C29-H29A  | -109.39 |
| C38-N3-C33-H33  | 5.00    | C8-C9-C11-H11B    | -69.45  | C30-C20-C29-H29B  | 130.61  |
| N2-N3-C38-O7    | 48.77   | C8-C9-C11-C12     | 52.16   | C30-C20-C29-H29C  | 10.61   |
| N2-N3-C38-H38   | 166.58  | H9A-C9-C11-H11A   | 60.07   | C19-C20-C30-H30A  | -179.52 |
| N2-N3-C38-C39   | -73.26  | H9A-C9-C11-H11B   | 176.83  | C19-C20-C30-H30B  | 0.48    |
| C33-N3-C38-O7   | -137.91 | H9A-C9-C11-C12    | -61.55  | C29-C20-C30-H30A  | 0.00    |
| C33-N3-C38-H38  | -20.09  | C10-C9-C11-H11A   | -55.01  | C29-C20-C30-H30B  | -180.00 |
| C33-N3-C38-C39  | 100.06  | C10-C9-C11-H11B   | 61.75   | C19-C21-C22-C17   | -30.67  |
| H1A-C1-C2-H2A   | -176.94 | C10-C9-C11-C12    | -176.63 | C19-C21-C22-H22A  | 88.58   |
| H1A-C1-C2-H2B   | -58.23  | C1-C10-C25-H25A   | -90.76  | C19-C21-C22-H22B  | -149.91 |
| H1A-C1-C2-C3    | 62.41   | C1-C10-C25-H25B   | 149.24  | H21A-C21-C22-C17  | -150.50 |
| H1B-C1-C2-H2A   | -59.21  | C1-C10-C25-H25C   | 29.24   | H21A-C21-C22-H22A | -31.26  |
| H1B-C1-C2-H2B   | 59.51   | C5-C10-C25-H25A   | 150.34  | H21A-C21-C22-H22B | 90.25   |
| H1B-C1-C2-C3    | -179.85 | C5-C10-C25-H25B   | 30.34   | H21B-C21-C22-C17  | 89.17   |
| C10-C1-C2-H2A   | 61.92   | C5-C10-C25-H25C   | -89.66  | H21B-C21-C22-H22A | -151.58 |
| C10-C1-C2-H2B   | -179.36 | C9-C10-C25-H25A   | 29.33   | H21B-C21-C22-H22B | -30.07  |
| C10-C1-C2-C3    | -58.72  | C9-C10-C25-H25B   | -90.67  | O2-C31-C32-N1     | 173.20  |
| H1A-C1-C10-C5   | -69.51  | C9-C10-C25-H25C   | 149.33  | O2-C31-C32-C33    | -1.12   |
| H1A-C1-C10-C9   | 45.46   | C9-C11-C12-H12A   | 71.37   | O3-C31-C32-N1     | -5.66   |
| H1A-C1-C10-C25  | 168.69  | C9-C11-C12-H12B   | -170.71 | O3-C31-C32-C33    | -179.98 |
| H1B-C1-C10-C5   | 172.75  | C9-C11-C12-C13    | -49.67  | N1-C32-C33-N3     | 0.38    |
| H1B-C1-C10-C9   | -72.27  | H11A-C11-C12-H12A | -50.25  | N1-C32-C33-H33    | -179.62 |
| H1B-C1-C10-C25  | 50.96   | H11A-C11-C12-H12B | 67.67   | C31-C32-C33-N3    | 175.26  |
| C2-C1-C10-C5    | 51.62   | H11A-C11-C12-C13  | -171.29 | C31-C32-C33-H33   | -4.74   |
| C2-C1-C10-C9    | 166.59  | H11B-C11-C12-H12A | -167.01 | O5-C34-C35-H35A   | -56.81  |
| C2-C1-C10-C25   | -70.17  | H11B-C11-C12-H12B | -49.09  | O5-C34-C35-H35B   | -176.81 |
| C1-C2-C3-O1     | -177.82 | H11B-C11-C12-C13  | 71.95   | O5-C34-C35-H35C   | 63.19   |
| C1-C2-C3-H3     | -60.09  | C11-C12-C13-H13   | -62.32  | H34A-C34-C35-H35A | 63.70   |
| C1-C2-C3-C4     | 61.29   | C11-C12-C13-C14   | 55.21   | H34A-C34-C35-H35B | -56.30  |
| H2A-C2-C3-O1    | 61.54   | C11-C12-C13-C18   | 178.31  | H34A-C34-C35-H35C | -176.30 |
| H2A-C2-C3-H3    | 179.27  | H12A-C12-C13-H13  | 176.64  | H34B-C34-C35-H35A | -177.32 |
| H2A-C2-C3-C4    | -59.35  | H12A-C12-C13-C14  | -65.83  | H34B-C34-C35-H35B | 62.68   |
| H2B-C2-C3-O1    | -57.18  | H12A-C12-C13-C18  | 57.28   | H34B-C34-C35-H35C | -57.32  |
| H2B-C2-C3-H3    | 60.55   | H12B-C12-C13-H13  | 58.72   | O6-C36-C37-H37A   | -69.88  |
| H2B-C2-C3-C4    | -178.06 | H12B-C12-C13-C14  | 176.25  | O6-C36-C37-H37B   | 170.12  |
| O1-C3-C4-C5     | -175.96 | H12B-C12-C13-C18  | -60.65  | O6-C36-C37-H37C   | 50.11   |
| O1-C3-C4-C23    | 66.66   | C12-C13-C14-C8    | -63.00  | H36A-C36-C37-H37A | 51.07   |
| O1-C3-C4-C24    | -50.59  | C12-C13-C14-C15   | 176.51  | H36A-C36-C37-H37B | -68.93  |
| C2-C3-C4-C5     | -55.53  | C12-C13-C14-C27   | 58.08   | H36A-C36-C37-H37C | 171.07  |
| C2-C3-C4-C23    | -172.90 | H13-C13-C14-C8    | 54.53   | H36B-C36-C37-H37A | 169.16  |
| C2-C3-C4-C24    | 69.85   | H13-C13-C14-C15   | -65.96  | H36B-C36-C37-H37B | 49.16   |
| H3-C3-C4-C5     | 65.86   | H13-C13-C14-C27   | 175.62  | H36B-C36-C37-H37C | -70.84  |
| H3-C3-C4-C23    | -51.51  | C18-C13-C14-C8    | 170.86  | O7-C38-C39-O8     | -178.29 |
| H3-C3-C4-C24    | -168.77 | C18-C13-C14-C15   | 50.37   | O7-C38-C39-H39    | -58.88  |
| C3-C4-C5-H5     | -63.65  | C18-C13-C14-C27   | -68.06  | O7-C38-C39-C40    | 61.13   |
| C3-C4-C5-C6     | -176.34 | C12-C13-C18-C17   | 172.68  | N3-C38-C39-O8     | -57.39  |
| C3-C4-C5-C10    | 51.34   | C12-C13-C18-H18   | -70.40  | N3-C38-C39-H39    | 62.02   |
| C23-C4-C5-H5    | 51.95   | C12-C13-C18-C19   | 51.22   | N3-C38-C39-C40    | -177.97 |
| C23-C4-C5-C6    | -60.74  | H13-C13-C18-C17   | 53.32   | H38-C38-C39-O8    | 62.77   |
| C23-C4-C5-C10   | 166.94  | H13-C13-C18-H18   | 170.24  | H38-C38-C39-H39   | -177.82 |
| C24-C4-C5-H5    | 173.28  | H13-C13-C18-C19   | -68.15  | H38-C38-C39-C40   | -57.81  |
| C24-C4-C5-C6    | 60.59   | C14-C13-C18-C17   | -63.01  | O8-C39-C40-O9     | 70.51   |
| C24-C4-C5-C10   | -71.73  | C14-C13-C18-H18   | 53.91   | O8-C39-C40-H40    | -49.74  |
| C3-C4-C23-H23A  | 62.61   | C14-C13-C18-C19   | 175.53  | O8-C39-C40-C41    | -167.74 |
| C3-C4-C23-H23B  | -57.39  | C8-C14-C15-H15A   | -42.03  | C38-C39-C40-O9    | -171.91 |
| C3-C4-C23-H23C  | -177.39 | C8-C14-C15-H15B   | 74.36   | C38-C39-C40-H40   | 67.85   |
| C5-C4-C23-H23A  | -52.09  | C8-C14-C15-C16    | -163.83 | C38-C39-C40-C41   | -50.15  |
| C5-C4-C23-H23B  | -172.09 | C13-C14-C15-H15A  | 75.53   | H39-C39-C40-O9    | -51.90  |
| C5-C4-C23-H23C  | 67.91   | C13-C14-C15-H15B  | -168.08 | H39-C39-C40-H40   | -172.14 |
| C24-C4-C23-H23A | -177.74 | C13-C14-C15-C16   | -46.28  | H39-C39-C40-C41   | 69.86   |

|                 |         |                   |         |                  |         |
|-----------------|---------|-------------------|---------|------------------|---------|
| C24-C4-C23-H23B | 62.26   | C27-C14-C15-H15A  | -164.13 | O9-C40-C41-O10   | -68.95  |
| C24-C4-C23-H23C | -57.74  | C27-C14-C15-H15B  | -47.73  | O9-C40-C41-H41   | 50.53   |
| C3-C4-C24-H24A  | 66.61   | C27-C14-C15-C16   | 74.07   | O9-C40-C41-C42   | 172.19  |
| C3-C4-C24-H24B  | -53.39  | C8-C14-C27-H27A   | -165.19 | C39-C40-C41-O10  | 164.52  |
| C3-C4-C24-H24C  | -173.39 | C8-C14-C27-H27B   | 74.81   | C39-C40-C41-H41  | -76.00  |
| C5-C4-C24-H24A  | -173.19 | C8-C14-C27-H27C   | -45.19  | C39-C40-C41-C42  | 45.66   |
| C5-C4-C24-H24B  | 66.81   | C13-C14-C27-H27A  | 77.25   | H40-C40-C41-O10  | 46.51   |
| C5-C4-C24-H24C  | -53.19  | C13-C14-C27-H27B  | -42.75  | H40-C40-C41-H41  | 166.00  |
| C23-C4-C24-H24A | -50.54  | C13-C14-C27-H27C  | -162.75 | H40-C40-C41-C42  | -72.34  |
| C23-C4-C24-H24B | -170.53 | C15-C14-C27-H27A  | -43.67  | O10-C41-C42-O7   | -169.44 |
| C23-C4-C24-H24C | 69.46   | C15-C14-C27-H27B  | -163.67 | O10-C41-C42-H42  | -49.09  |
| C4-C5-C6-H6A    | -75.77  | C15-C14-C27-H27C  | 76.33   | O10-C41-C42-C43  | 71.47   |
| C4-C5-C6-H6B    | 42.40   | C14-C15-C16-H16A  | -68.93  | C40-C41-C42-O7   | -48.03  |
| C4-C5-C6-C7     | 163.32  | C14-C15-C16-H16B  | 173.03  | C40-C41-C42-H42  | 72.32   |
| H5-C5-C6-H6A    | 171.55  | C14-C15-C16-C17   | 52.05   | C40-C41-C42-C43  | -167.13 |
| H5-C5-C6-H6B    | -70.29  | H15A-C15-C16-H16A | 169.26  | H41-C41-C42-O7   | 73.63   |
| H5-C5-C6-C7     | 50.63   | H15A-C15-C16-H16B | 51.23   | H41-C41-C42-H42  | -166.02 |
| C10-C5-C6-H6A   | 60.08   | H15A-C15-C16-C17  | -69.75  | H41-C41-C42-C43  | -45.47  |
| C10-C5-C6-H6B   | 178.24  | H15B-C15-C16-H16A | 52.87   | O7-C42-C43-O11   | -67.13  |
| C10-C5-C6-C7    | -60.84  | H15B-C15-C16-H16B | -65.16  | O7-C42-C43-H43A  | 53.65   |
| C4-C5-C10-C1    | -51.24  | H15B-C15-C16-C17  | 173.85  | O7-C42-C43-H43B  | 172.08  |
| C4-C5-C10-C9    | -167.67 | C15-C16-C17-C18   | -58.83  | C41-C42-C43-O11  | 54.25   |
| C4-C5-C10-C25   | 67.25   | C15-C16-C17-C22   | -171.10 | C41-C42-C43-H43A | 175.04  |
| H5-C5-C10-C1    | 63.76   | C15-C16-C17-C28   | 61.35   | C41-C42-C43-H43B | -66.53  |
| H5-C5-C10-C9    | -52.68  | H16A-C16-C17-C18  | 62.15   | H42-C42-C43-O11  | 174.81  |
| H5-C5-C10-C25   | -177.76 | H16A-C16-C17-C22  | -50.12  | H42-C42-C43-H43A | -64.41  |
| C6-C5-C10-C1    | 175.22  | H16A-C16-C17-C28  | -177.67 | H42-C42-C43-H43B | 54.02   |
| C6-C5-C10-C9    | 58.78   | H16B-C16-C17-C18  | -179.82 | C22-C17-C18-C19  | -40.48  |
| C6-C5-C10-C25   | -66.29  | H16B-C16-C17-C22  | 67.92   | H6A-C6-C7-H7A    | 173.44  |
| C5-C6-C7-H7A    | -65.64  | H16B-C16-C17-C28  | -59.64  | H6A-C6-C7-H7B    | 56.36   |
| C5-C6-C7-H7B    | 177.28  | C16-C17-C18-C13   | 67.08   | H6A-C6-C7-C8     | -65.10  |
| C5-C6-C7-C8     | 55.82   | C16-C17-C18-H18   | -49.84  | C22-C17-C18-H18  | 73.02   |
| C22-C17-C18-C13 | -170.06 | C16-C17-C18-C19   | -163.34 |                  |         |
